# Supplementary material for: Ketorolac beats ketoprofen: lower photodecarboxylation, photohemolysis and phototoxicity
Source: Royal Society of Chemistry journal article supplement (doi:10.1039/c3md00258f), 2013-01-01
Supplement: c3md00258f.pdf [file c3md00258f.pdf]

1           Supporting information for: Ketorolac beats  
2           Ketoprofen: lower photodecarboxylation,  
3           photohemolysis and phototoxicity

4           *Christopher D. McTiernan, Chiara Fasciani, María González-Béjar, Daniel Roca-*  
5                           *Sanjuán, Emilio I. Alarcon, and José Carlos Netto-Ferreira*

- 6   **Page S1-S2:** Index  
7   **Page S3:** Materials, syntheses and characterization  
8   **Page S4-S5:** Phototoxicity Assay  
9   **Page S6-S7:** Photohemolysis Assay  
10 **Page S7: Figure S1.** Ketorolac UV-Visible spectra in acetonitrile or in 100 mM phosphate buffer  
11 pH 7.0  
12 **Page S8-S9:** Theoretical methods and analyses  
13 **Page S10: Figure S2.** Molecular orbitals employed as active orbitals in the  
14 CASSCF/CASPT2(16-in-14) computations of ketorolac.  
15 **Page S11: Figure S3.** Ketorolac structure and labeling.  
16 **Page S11: Table S1.** Solvent effects in the stability of the ground-state *cis* and *trans* ketorolac  
17 isomers.  
18 **Page S13: Figure S4.** Stability analysis of the ground-state *cis* and *trans* ketorolac isomers in the  
19 gas phase.  
20 **Page S13: Table S2.** Calculated CASSCF/CASPT2 and DFT excitation energies and oscillator  
21 strengths for the singlet excited states in ketorolac.

- 1 **Page S14: Table S3.** Excitation energies ( $\Delta E$ ; eV, and nm in parenthesis) and oscillator strengths  
2 ( $f$ ) for the *cis*-ketorolac lowest-lying singlet excited state [ $^1(\pi_{\text{Py}} \rightarrow \pi_{\text{CO}}^*)$ ] computed at different  
3 levels of theory.
- 4 **Page S14: Table S4.** Calculated B3LYP excitation energies ( $\Delta E$ ; eV, and nm in parenthesis) and  
5 oscillator strengths ( $f$ ) in vacuo for the low-lying singlet excited state in the *cis* and *trans* isomers  
6 of ketorolac.
- 7 **Page S15: Table S5.** Calculated CASSCF/CASPT2 excitation energies and total dipole moments  
8 for the triplet excited states of ketorolac.
- 9 **Page S16: Table S6.** Calculated CASSCF/CASPT2 emission energies for the low-lying triplet  
10 excited states for ketorolac in gas phase and solvatochromic shifts in ACN.
- 11 **Page S16: Table S7.** CASSCF(12-in-12)/ANO-S 321/21 calculated gas-phase most relevant  
12 geometrical parameters for the ground (gs) and the lowest-lying excited singlet [ $^1(\pi_{\text{Py}}, \pi_{\text{CO}}^*)$ ] and  
13 triplet [ $^3(\pi_{\text{Py}}, \pi_{\text{Py,CO}}^*)$ ] and [ $^3(n_{\text{O}}, \pi_{\text{CO}}^*)$ ] states in *cis*-ketorolac.
- 14 **Page S17:** Time-resolved measurements.
- 15 **Page S18: Figure S5.**  $1/k_{\text{obs}}$  at 620 nm as function of 1-methylnaphthalene concentration (**top**)  
16 transient signal profile for ketorolac at 620 nm and 1-methylnaphthalene at 420 nm (**bottom**)  
17 after laser excitation.
- 18 **Page S19: Figure S6.** Singlet oxygen phosphorescence time profile at 1270 nm obtained after  
19 laser excitation at 266 nm.
- 20 **Page S19: Figure S7.** Ketorolac phosphorescence spectrum.
- 21 **Page S20: Figure S8.** Dependence of natural logarithm of the rate constant for Ketorolac  
22 transient at 620 nm with the reciprocal of the temperature. In acetonitrile or buffer pH 7.4 in  
23 nitrogen saturated solution.
- 24 **Page S20: Figure S9.** Transient absorption spectra for ketorolac acid (red circles) and ketorolac  
25 methyl ester (blue circles) obtained 1.0  $\mu\text{s}$  after 266 nm laser excitation.
- 26 **Page S21: Figure S10.** 2-Benzoylpyrrole transient absorption spectra obtained at 0.9, 1.5, 3.5 and  
27 4.5  $\mu\text{s}$  after 266 nm laser excitation under nitrogen. Inset: kinetic time profile monitored at 370  
28 nm.
- 29

## 1 MATERIALS AND METHODS

2 Materials: Ketorolac tromethamine was purchased from Sigma Aldrich and used as  
3 received or in its acidic form. NaCl, NaH<sub>2</sub>PO<sub>4</sub>, Na<sub>2</sub>HPO<sub>4</sub>, dichloromethane, phenalenone,  
4 benzophenone, 1-methylnaphthalene, 1,4-cyclohexadiene, 2-propanol, tryptophan methyl  
5 ester, tyrosine methyl ester, 2'-deoxyguanosine (>99%) and tolmetin were purchased  
6 from Sigma-Aldrich. Phenyl(1*H*-pyrrol-2-yl)methanone (2-benzoylpyrrole) was obtained  
7 from Maybridge (part of Thermo Fisher Scientific).

8 *Synthesis and characterization of 5-benzoyl-2,3-dihydro-1H-pyrrolizine-1-carboxylic*  
9 *acid methyl ester (Ketorolac ester):* To a dry methanolic solution of Ketorolac acid (50  
10 mg, 0.19 mmol) under nitrogen at room temperature, thionyl chloride (10 mL, 138 mmol)  
11 was added and heated under reflux, under vigorous stirring, for 14 h. After, the solvent  
12 was removed and the residue was treated with 10% NaOH (2 x 15 mL) and extracted  
13 with ethyl acetate (3 x 10 mL). The combined organic fractions were washed with  
14 saturated aqueous sodium bicarbonate (2 x 10 mL), and water (10 mL). The organic  
15 solution was dried with anhydrous Na<sub>2</sub>SO<sub>4</sub>, filtered, and evaporated. The residual yellow  
16 oil was purified via column chromatography (SiO<sub>2</sub>, ethyl acetate/hexane (2:1; v/v)) to  
17 yield 5-benzoyl-2,3-dihydro-1H-pyrrolizine-1-carboxylic acid methyl ester (38.5 mg,  
18 0.14 mmol, 73%). The NMR signals match literature reports.<sup>1</sup> C<sub>16</sub>H<sub>15</sub>NO<sub>3</sub>:<sup>1</sup>H-NMR (400  
19 MHz, CDCl<sub>3</sub>) δ 2.76-2.96 (m, 2H), 3.77 (s, 3H), 4.08 (m, 1H), 4.41-4.48 (m, 1H), 4.54-  
20 4.61 (m, 1H), 6.10 (d, 1H, *J*=4 Hz), 6.82 (d, 1H, *J*=4 Hz), 7.43 (m, 3H), 7.80 (s, 1H), 7.82  
21 (s, 1H). <sup>13</sup>C-NMR (100 MHz, CDCl<sub>3</sub>): δ 30.6 (s), 42.1 (s), 47.2 (s), 52.2 (s), 102.8 (s),  
22 124.6 (s), 126.8 (s), 127.8 (d), 128.5 (d), 131.0 (s), 138.9 (s), 142.0 (s), 171.9 (s), 184.7  
23 (s).

1 *Synthesis and characterization of 5-benzoyl-1,2-dihydro-3H-pyrrolo[1,2a]pyrrole*  
2 (*Ketorolac decarboxylation product*): A saturated solution of Ketorolac thrometamine in  
3 acetonitrile (250 mL) under nitrogen at room temperature was irradiated with 8 UVB  
4 lamps in a pyrex round bottom flask in a LZC4V-Luzchem photoreactor. The solvent was  
5 evaporated and chloroform and an acidic solution were added to the solid. After  
6 separation of the two phases, anhydrous MgSO<sub>4</sub> was added to the organic part, and  
7 solvent was evaporated after filtration. The solid was dissolved in CDCl<sub>3</sub> and analyzed by  
8 <sup>1</sup>H-NMR. The NMR signals match literature reports and only the decarboxylated product  
9 was observed.<sup>3</sup> C<sub>14</sub>H<sub>13</sub>NO: <sup>1</sup>H-NMR (400 MHz, CDCl<sub>3</sub>) δ 2.55-2.87 (m, 4H), 4.74 (t,  
10 2H), 5.92-6.79 (m, 2H), 7.42-7.50 (m, 3H), 7.79 (m, 2H).

11 *Absorbance measurements*: Absorption spectra were recorded using a Cary-100 UV-  
12 Visible spectrophotometer (Palo Alto, CA, USA) equipped with a 1.0 cm cell holder. All  
13 measurements were recorded at room temperature unless otherwise indicated.

#### 14 **PHOTOTOXICITY ASSAY**

15 The phototoxicity of several NSAIDs and their photodecomposition products were  
16 evaluated *in vitro* on human dermal fibroblasts at low passage number (between 1 and 5).  
17 The fibroblasts were grown in Dulbecco's modified eagle's medium (DMEM, Gibco)  
18 containing 10% fetal calf serum (Invitrogen) and penicillin/streptomycin (Lonza  
19 Walkersville), and cultured at 37 °C, 5.0% CO<sub>2</sub> in a humidified incubator. Phototoxicity  
20 was evaluated by using CellTiter96<sup>®</sup> Aqueous MTS (3-(4,5-dimethyl-2-tiazol)-2,5-  
21 diphenil-2H-tetrazolium bromide; tiazol blue) colorimetric viability assay (Promega) and  
22 employed as a measure of cell survival. Briefly, from a confluent cell culture, 5 x 10<sup>4</sup>  
23 cells/mL (cell counting was carried out using the trypan blue exclusion method) were

1 seeded into 96-well plates, after which different dilutions of the NSAIDs and their  
2 corresponding photodecomposition products were added before a 14 h incubation period.  
3 The plate was organized in such a way that each of the drugs was tested in triplicate and  
4 at three different concentrations (1, 10, and 100  $\mu\text{M}$ ). The plates also contained control  
5 wells, to which no drug was added, or to which only different concentrations of DMSO  
6 (0.1, 1.0, and 10.0%) were added to account for the fact that the different solutions were  
7 prepared through dilution of a DMSO stock solution using DMEM supplemented with  
8 fetal calf serum. The wells were also loaded in such a way that the left and right half the  
9 plates are identical, allowing for one of the sides to be covered with aluminum foil to  
10 prevent UVA exposure. Following the 14 h incubation period, each of the wells were  
11 washed with 200  $\mu\text{L}$  of fresh media to ensure removal of any trace of the drugs which  
12 were not up taken by the cells. The contents of the wells were then replaced with 100  $\mu\text{L}$   
13 of fresh media. There were 6 plates labeled P1-P6. Plates P1 and P4 were control plates  
14 and were not exposed to UVA light and were analyzed by MTS assay immediately after  
15 the 14 h incubation and 24 h after the initial 14 h incubation, respectively. The other  
16 plates were irradiated for either 2 or 4 h in a 37  $^{\circ}\text{C}$ , 5.0%  $\text{CO}_2$  humidified incubator,  
17 using a Luzchem Expo panel fitted with 5 UVA lamps (51915.7  $\text{mW}/\text{m}^2$ ). Plates P2 and  
18 P3 were analyzed immediately after 2 h and 4 h irradiations; whereas plate P5 and P6  
19 were analyzed 24 h after 2 h and 4 h irradiations, respectively. The MTS assays were  
20 performed by the addition of 20  $\mu\text{L}$  of MTS solution to each of the wells followed by  
21 incubation in a 37  $^{\circ}\text{C}$ , 5.0%  $\text{CO}_2$  humidified incubator for 1 h. The absorbance was then  
22 recorded at 490 nm in a Victor well plate reader, at 20  $^{\circ}\text{C}$ .

23

## 1 **PHOTOHEMOLYSIS ASSAY**

2 Freshly drawn blood was obtained from Mr. Christopher McTiernan. To isolate the  
3 erythrocytes, the sample was diluted 10 fold with PBS and centrifuged 3x at 2500 rpm for  
4 15 minutes. After each centrifugation, the supernatant was carefully removed and  
5 discarded, while the remaining solution was resuspended in PBS.

6 The erythrocyte suspension was then diluted with PBS so that the optical density of the  
7 solution was between 0.4-0.8 at 650 nm. An OD of 0.5 corresponds to  $3.3 \times 10^6$  cells/ml.

8 The hemolysis was determined by measuring the decreasing OD at 650 nm. This is due to  
9 the fact that it has been reported that the optical density at 650 nm is linearly proportional  
10 to the amount of intact red blood cells. The drugs and their corresponding decarboxylated  
11 photoproducts were added to the suspensions as solutions in DMSO. The percentage of  
12 DMSO in the final solution is less than 1% in all cases. The hemolysis experiments were  
13 conducted at 10, 30, and 60  $\mu\text{M}$  of the compounds. The results are the average of  
14 triplicate experiments. In each case the solutions were UVA irradiated as 4mL samples in  
15 quartz test tubes. The irradiation of the samples was conducted using a Luzchem  
16 photoreactor fitted with 14 UVA ( $81197.4 \text{ mW/m}^2$ ) bulbs and a sample carousel. The  
17 temperature inside the reactor was kept at  $25^\circ\text{C}$  for the duration of the experiment. The  
18 samples were irradiated for 15 minutes and then left in the dark for 1 hour prior to  
19 analysis. As controls samples containing no compound and the various concentrations of  
20 compound were kept in the dark for the same amount of time before analysis. A control  
21 was also performed to ensure that DMSO itself does not induce hemolysis. In all cases  
22 minimal to no hemolysis was seen in the controls. The 100% hemolysed sample was  
23 prepared through sonication of a suspension of RBC in PBS.

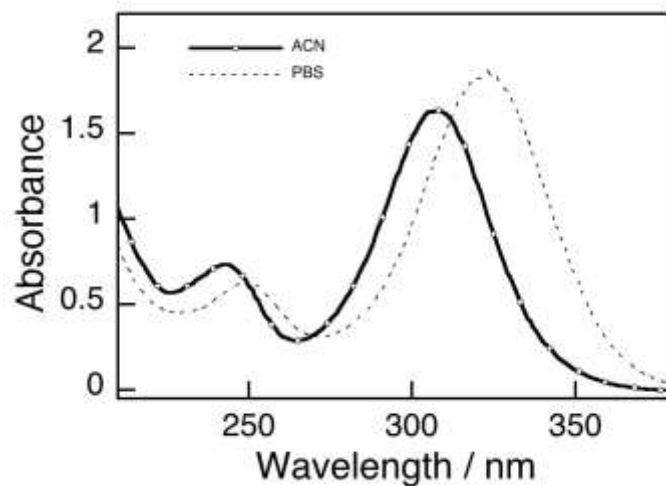

1  
2 **Figure S1.** Ketorolac UV-Visible spectra in acetonitrile (black line) or in 100 mM  
3 phosphate buffer pH 7.0 (dashed line).  
4

## 1 THEORETICAL METHODS AND ANALYSES

2 *Computational details.* The present theoretical analyses were carried out by using the  
3 DFT and CASSCF/CASPT2 methods as implemented in the Gaussian 09<sup>4</sup> and MOLCAS  
4 7.6<sup>5</sup> quantum-chemical packages of software, respectively. The B3LYP hybrid density  
5 functional and both 6-31G(*d,p*) and 6-31+G(*d,p*) basis sets were employed in the DFT  
6 calculations. In particular, DFT geometry optimizations were performed at the B3LYP/6-  
7 31G(*d,p*) level of theory and at the optimized structures energies were computed at the  
8 B3LYP/6-31+G(*d,p*) level, namely the B3LYP/6-31+G(*d,p*)/6-31G(*d,p*) approach.  
9 Within the multiconfigurational CASSCF/CASPT2 calculations, the basis sets of atomic  
10 natural orbital ANO-S and ANO-L contracted to C,N,O [3s,2p,1d]/H [2s1p] and to C,N,O  
11 [4s3p1d]/H[2s1p] (hereafter ANO-S 321/21 and ANO-L 431/21, respectively).<sup>6</sup> While  
12 ground-state geometry optimizations were carried out at the CASSCF/ANO-S 321/21  
13 level of theory, the structure of the lowest singlet excited state was optimized with the  
14 largest basis set (CASSCF/ANO-L 431/21 level).

15 Energies were calculated at the CASPT2/ANO-L 431/21 level. These approaches will  
16 be called CASPT2/ANO-L 431/21//CASSCF/ANO-S 321/21 and  
17 CASPT2//CASSCF/ANO-L 431/21, respectively. An active space of 12 electrons in 12  
18 orbitals was employed in the CASSCF/CASPT2 calculations of the  $\pi \rightarrow \pi^*$  states  
19 [CASSCF/CASPT2(12-in-12)], which comprises all the  $\pi$  orbitals in the benzene,  
20 carbonyl, and pyrrole groups except the all-in-phase  $\pi$  orbital in the benzene moiety (see  
21 Figure S2 for an illustration of the orbital shapes).

22 In some cases, the later orbital was also included in the active space, resulting in the  
23 CASSCF/CASPT2(14-in-13) level. For the characterization of the  $n \rightarrow \pi^*$  states the



1 oxygen lone pair;  $n_{\text{O}}$  in the  $\text{C}_3\text{O}_1$  moiety (see Fig. S3 for atom labeling) was treated in  
2 addition as active orbital together with the whole  $\pi$ -system [CASSCF/CASPT2(16-in-14)  
3 approach]. In CASPT2 calculations, the core orbitals of non-hydrogen atoms were not  
4 correlated, an imaginary level-shift of 0.2 a.u., was turn on a priori to minimize weakly  
5 interacting intruder states, and the non-standard IPEA modification of the zeroth-order  
6 Hamiltonian with a value of 0.00 a.u. was employed. The effect of polar solvents in the  
7 computed gas-phase properties was studied throughout the analysis of the dipole  
8 moments for ground and excited states or alternatively means polarized continuum model  
9 (PCM).

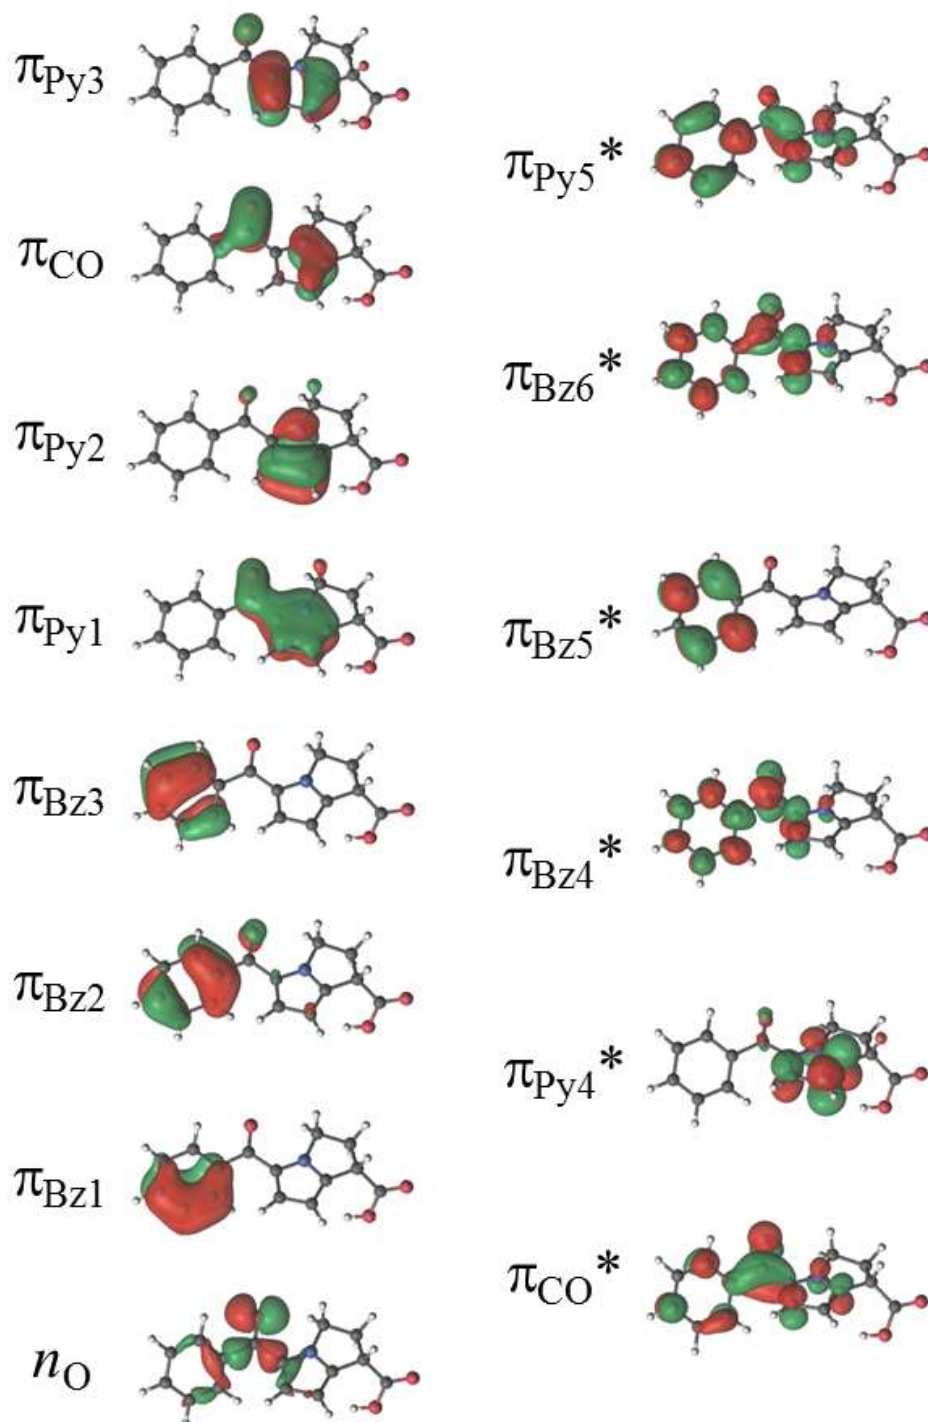

1

2 **Figure S2.** Molecular orbitals employed as active orbitals in the CASSCF/CASPT2(16-  
3 in-14) computations of ketorolac. The lone pair of the oxygen atom  $n_{\text{O}}$  is kept inactive in  
4 the CASSCF/CASPT2(14-in-13) calculations and the CASSCF/CASPT2(12-in-12)  
5 computations employ, in the active space, all the orbitals except  $n_{\text{O}}$  and the all-in-phase  
6  $\pi_{\text{Bz}1}$  orbital.

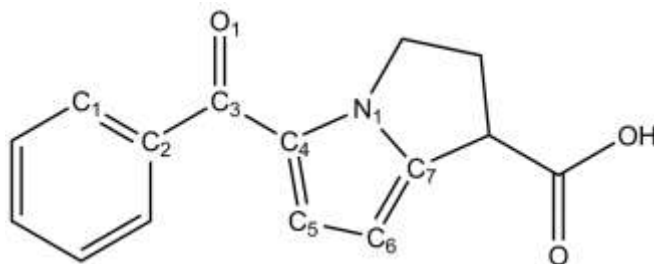

**Figure S3.** Ketorolac structure and atom labeling.

1  
2  
3 *Conformational analysis, solvent effects and absorption spectrum.* Variations in the  
4  $O_1C_3C_4N_1$  dihedral angle of ketorolac (see Fig. S3) can originate two isomers *cis* and  
5 *trans* where the *cis* isomer is around 4.5 kcal/mol, in the gas phase, more stable than the  
6 *trans* form (see Figure S4). However, computational calculations reveal that in  
7 acetonitrile both isomers are stabilized by ~10 kcal/mol maintaining a similar relative  
8 energy difference as *in-vacuo* (see Table S1). According to these relative energies,  
9 equilibrium between both forms is expected at room temperature placing the *cis* isomer  
10 around 3.6 kcal/mol lower than the *trans*. Thus, our theoretical studies will be mainly  
11 focused on the *cis* form (in some cases the *trans* isomer has been also included).

12 **Table S1.** Solvent effects in the stability of the ground-state *cis* and *trans* ketorolac  
13 isomers. Energies (in kcal/mol) relative to the *cis* isomer in vacuo and to the *cis* in  
14 acetonitrile (in parenthesis).

|              | In vacuo | Acetonitrile |
|--------------|----------|--------------|
| <i>Cis</i>   | 0.00     | -9.11 (0.00) |
| <i>Trans</i> | 4.48     | -5.53 (3.58) |

15  
16 Table S2 compiles the low-energy absorption spectrum of ketorolac computed at the  
17 CASPT2 and DFT computational levels in the gas phase or acetonitrile. Rendering that  
18 the lowest vertical absorption energies correspond to electronic excitations from the  
19 oxygen lone pair, of the carbonyl group, and the  $\pi$  orbitals the pyrrole and benzene to the

1 antibonding  $\pi^*$  orbital of the  $C_3O_1$  moiety [ $^1(n_O \rightarrow \pi_{CO}^*)$ ,  $^1(\pi_{Py} \rightarrow \pi_{CO}^*)$ , and  $^1(\pi_{Bz} \rightarrow \pi_{CO}^*)$ ,  
2 respectively]. In particular, a value of 3.85 eV is obtained at the CASPT2 level for the  
3  $^1(n_O \rightarrow \pi_{CO}^*)$  excitation in the gas phase, which follows from the  $^1(\pi_{Py} \rightarrow \pi_{CO}^*)$ ,  
4  $^1(\pi_{Bz} \rightarrow \pi_{CO}^*)$ , and a secondary  $^1(\pi_{Py} \rightarrow \pi_{CO}^*)$  with energies of 4.46, 4.70 eV, and 4.76 eV,  
5 respectively. Similar calculations carried out in DFT result in lower energies with  
6 differences at most 0.30 eV, for the lowest  $^1(\pi_{Py} \rightarrow \pi_{CO}^*)$  state. Additionally, solvent  
7 effect in the DFT method and PCM model showed small changes in the excitation  
8 energies, with a blue shift in the  $^1(n_O \rightarrow \pi_{CO}^*)$  transition (0.10 eV larger) and red shifts of  
9 the  $^1(\pi \rightarrow \pi_{CO}^*)$  excitation (lower values in the range 0.09-0.12 eV). In general, although  
10  $^1(n_O \rightarrow \pi_{CO}^*)$  requires the lowest excitation energy, this will be a dark transition in the  
11 absorption spectrum as expected from its lower oscillator strength ( $f$ ). Thus, light  
12 absorption will mainly excite electrons from the  $\pi$ -system of the pyrrole ring to the  
13 antibonding  $\pi^*$  orbital of the carbonyl group. Interestingly, both CASSCF/CASPT2 and  
14 DFT approaches in gas-phase render excitation energies in the range 4.16-4.46 eV (or  
15 298-278 nm) for this state that increases to 4.04 eV (or 307 nm) in ACN (see Tables S2  
16 and S3). Similar results are found in the DFT study of the absorption spectrum in the  
17 *trans* isomer of ketorolac (see Table S4), with excitation energies close to the values  
18 related to *cis*-ketorolac (energy differences no larger than 0.13 eV). According to these  
19 theoretical analyses, the lowest and brightest absorption band measured in the  
20 experiments (Figure S1) can be clearly related to the lowest  $^1(\pi_{Py} \rightarrow \pi_{CO}^*)$  state.

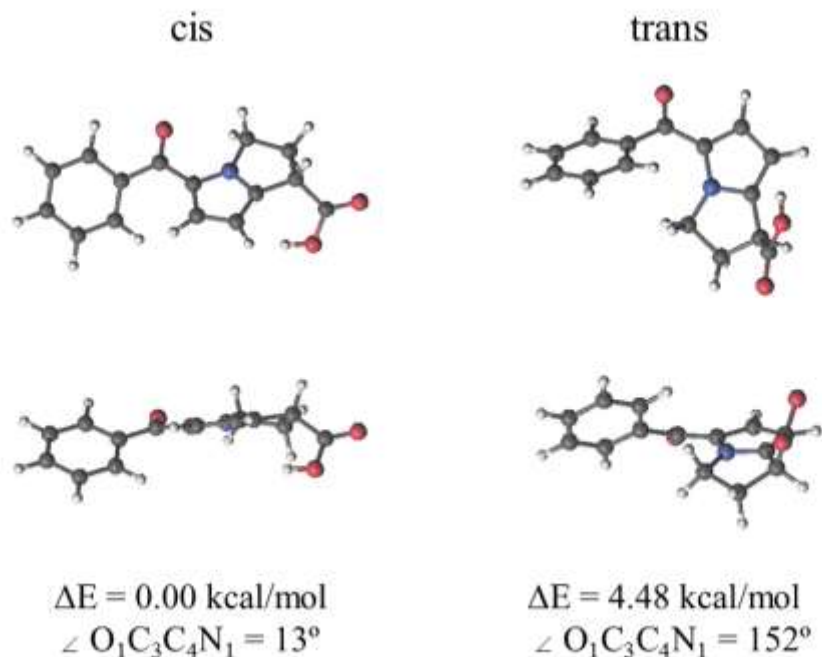

1

2 **Figure S4.** Stability analysis of the ground-state *cis* and *trans* ketorolac isomers in the  
 3 gas phase. Structures (frontal and side views) and energies relative to the most stable  
 4 isomer computed at the B3LYP/6-31G(*d,p*) level of theory.

5 **Table S2.** Calculated CASSCF/CASPT2 and DFT excitation energies ( $\Delta E$ ; eV, and nm in  
 6 parenthesis) and oscillator strengths (*f*) for the singlet excited states in ketorolac.

| State                                           | CASPT2     |          | DFT        |          |              |          |
|-------------------------------------------------|------------|----------|------------|----------|--------------|----------|
|                                                 | $\Delta E$ | <i>f</i> | In vacuo   |          | Acetonitrile |          |
|                                                 |            |          | $\Delta E$ | <i>f</i> | $\Delta E$   | <i>f</i> |
| Singlet ( $\pi \rightarrow \pi^*$ ) transitions |            |          |            |          |              |          |
| $^1(\pi_{Py} \rightarrow \pi_{CO}^*)$           | 4.46 (278) | 0.247    | 4.16 (298) | 0.388    | 4.04 (307)   | 0.493    |
| $^1(\pi_{Py} \rightarrow \pi_{CO}^*)$           | 4.76 (260) | 0.191    | 4.54 (273) | 0.011    | 4.45 (279)   | 0.024    |
| $^1(\pi_{Bz} \rightarrow \pi_{CO}^*)$           | 4.70 (264) | 0.012    | 4.62 (268) | 0.020    | 4.52 (274)   | 0.014    |
| Singlet ( $n \rightarrow \pi^*$ ) transitions   |            |          |            |          |              |          |
| $^1(n_O \rightarrow \pi_{CO}^*)$                | 3.85 (322) | 0.001    | 3.72 (333) | 0.001    | 3.82 (325)   | 0.002    |

7

1 **Table S3.** Excitation energies ( $\Delta E$ ; eV, and nm in parenthesis) and oscillator strengths ( $f$ )  
 2 for the *cis*-ketorolac lowest-lying singlet excited state  $^1(\pi_{\text{Py}} \rightarrow \pi_{\text{CO}}^*)$  computed at different  
 3 levels of theory.

| Method                   | $\Delta E$ | $F$   |
|--------------------------|------------|-------|
| In vacuo                 |            |       |
| B3LYP                    | 4.16 (298) | 0.388 |
| CASPT2//CASSCF(12-in-12) | 4.46 (278) | 0.247 |
| CASPT2//CASSCF(14-in-13) | 4.45 (278) | 0.175 |
| CASPT2//CASSCF(16-in-14) | 4.40 (282) | 0.216 |
| Acetonitrile             |            |       |
| B3LYP                    | 4.04 (307) | 0.493 |

4

5 **Table S4.** Calculated B3LYP excitation energies ( $\Delta E$ ; eV, and nm in parenthesis) and  
 6 oscillator strengths ( $f$ ) in vacuo for the low-lying singlet excited state in the *cis* and *trans*  
 7 isomers of ketorolac.

|                                                     | cis        |       | Trans      |       |
|-----------------------------------------------------|------------|-------|------------|-------|
|                                                     | $\Delta E$ | $f$   | $\Delta E$ | $F$   |
| $^1(n_{\text{O}} \rightarrow \pi_{\text{CO}}^*)$    | 3.72 (333) | 0.001 | 3.62 (342) | 0.010 |
| $^1(\pi_{\text{Py}} \rightarrow \pi_{\text{CO}}^*)$ | 4.16 (298) | 0.388 | 4.03 (307) | 0.234 |
| $^1(\pi_{\text{Py}} \rightarrow \pi_{\text{CO}}^*)$ | 4.54 (273) | 0.011 | 4.57 (271) | 0.010 |
| $^1(\pi_{\text{Py}} \rightarrow \pi_{\text{CO}}^*)$ | 4.62 (268) | 0.020 | 4.66 (266) | 0.017 |

8

9

10 *Low-lying triplet states.* Gas-phase CASPT2 computations of the lowest triplet  
 11 excitations at the geometry of the ground-state minimum structure were assessed. Table  
 12 S5 shows the presence of three triplet states very close in energy and below the excitation  
 13 energy of the brightest singlet  $^1(\pi_{\text{Py}} \rightarrow \pi_{\text{CO}}^*)$  state (cf. Table S2): a  $^3(n_{\text{O}} \rightarrow \pi_{\text{CO}}^*)$  state at  
 14 3.57 eV and two  $^3(\pi \rightarrow \pi_{\text{CO}}^*)$  states at 3.55 and 3.62 eV. According to the total dipole

1 moment ( $\mu$ ) analysis, these energies are not expected to change markedly since the  $\mu$   
 2 values for these triplet states are very close and not far from the  $\mu$  of the singlet ground  
 3 state [ $\mu$  ( $S_0$ )]. All three triplet states can in principle be populated along the deactivation  
 4 path of the brightest singlet state by means of an intersystem-crossing process. The triplet  
 5  $^3(n_O \rightarrow \pi_{CO}^*)$  will be however more favored taking into account the El-Sayed principle.<sup>7</sup>

6 **Table S5.** Calculated CASSCF/CASPT2 excitation energies ( $\Delta E$ ; eV, and nm) and total  
 7 dipole moments ( $\mu$ , in Debye) for the triplet excited states of ketorolac.

| State                                           | $\Delta E$ |     | $\mu^a$ |
|-------------------------------------------------|------------|-----|---------|
|                                                 | eV         | nm  |         |
| Triplet ( $\pi \rightarrow \pi^*$ ) transitions |            |     |         |
| $^3(\pi_{Py} \rightarrow \pi_{CO}^*)$           | 3.55       | 348 | 3.81    |
| $^3(\pi_{Bz} \rightarrow \pi_{Bz}^*)$           | 3.62       | 341 | 5.26    |
| $^3(\pi_{Bz} \rightarrow \pi_{CO}^*)$           | 4.56       | 272 | 4.13    |
| Triplet ( $n \rightarrow \pi^*$ ) transitions   |            |     |         |
| $^3(n_O \rightarrow \pi_{CO}^*)$                | 3.57       | 347 | 5.02    |

8 <sup>a</sup>  $\mu$  ( $S_0$ ) = 4.69 Debye.

9  
 10 The geometries of the two lowest lying triplet state at the Franck-Condon region,  
 11  $^3(\pi_{Py} \rightarrow \pi_{CO}^*)$  and  $^3(n_O \rightarrow \pi_{CO}^*)$ , were optimized at the CASSCF level of theory. Thus,  
 12 while the  $^3(n_O \rightarrow \pi_{CO}^*)$  relaxed structure results in a large  $C_3O_1$  bond of 1.36 Å (see Table  
 13 S7), the  $^3(\pi_{Py} \rightarrow \pi_{CO}^*)$  state evolves towards a delocalized excitation over the  $\pi$  system of  
 14 the CO and pyrrole groups,  $^3(\pi_{Py} \rightarrow \pi_{Py,CO}^*)$ , and the main geometrical change  
 15 corresponds to a butterfly movement of the two rings in the pyrrole (the dihedral angle  
 16  $C_7N_1C_4C_8$  is found to be 127 degrees in the minimum structure of this state). Table S6  
 17 compiles the predicted phosphorescence emission for both  $^3(\pi_{Py} \rightarrow \pi_{Py,CO}^*)$  and

1  $^3(n_{\text{O}} \rightarrow \pi_{\text{CO}}^*)$  states. Coincidentally, the experimental observation (see Fig. S2) is consistent  
 2 with the computed band maximum ( $E_{\text{VE}}$ ) related to the  $^3(n_{\text{O}} \rightarrow \pi_{\text{CO}}^*)$  state ( $E_{\text{VE}} = 2.60$  eV).  
 3 The emission from  $^3(\pi_{\text{Py}} \rightarrow \pi_{\text{Py,CO}}^*)$  is found at lower energies ( $E_{\text{VE}} = 2.19$  eV) and  
 4 therefore might be relevant in the photophysics of ketorolac.

5 **Table S6.** Calculated CASSCF/CASPT2 emission energies (eV, and nm in parenthesis)  
 6 for the low-lying triplet excited states for ketorolac in gas phase. Solvatochromic shifts in  
 7 ACN, obtained from the analysis of the CASSCF dipole moments, are also indicated  
 8 qualitatively (*srs* and *ns* states for small red-shift, and no shift, respectively)

|                                                        | $0 \rightarrow 0^a$  | $E_{\text{VE}}^b$     |
|--------------------------------------------------------|----------------------|-----------------------|
| $^3(\pi_{\text{Py}} \rightarrow \pi_{\text{Py,CO}}^*)$ | 2.94 (420) <i>ns</i> | 2.19 (564) <i>ns</i>  |
| $^3(n_{\text{O}} \rightarrow \pi_{\text{CO}}^*)$       | 3.05 (406) <i>ns</i> | 2.60 (477) <i>srs</i> |

9  $^a 0 \rightarrow 0$  = beginning of the band, i.e., between the ground state  
 10 geometry and the minimum of the excited state.  $^b E_{\text{VE}}$  =  
 11 emission maximum, from the excited state geometry  
 12 vertically to the ground state.  
 13

14 **Table S7.** CASSCF(12-in-12)/ANO-S 321/21 calculated gas-phase most relevant  
 15 geometrical parameters for the ground (gs) and the lowest-lying excited singlet  
 16 [ $^1(\pi_{\text{Py}} \rightarrow \pi_{\text{CO}}^*)$ ] and triplet [ $^3(\pi_{\text{Py}} \rightarrow \pi_{\text{Py,CO}}^*)$  and  $^3(n_{\text{O}} \rightarrow \pi_{\text{CO}}^*)$ ] states in *cis*-ketorolac. Bond  
 17 lengths in Å and dihedral angles in degrees.

|                                                             | gs   | $^1(\pi_{\text{Py}} \rightarrow \pi_{\text{CO}}^*)$ | $^3(\pi_{\text{Py}} \rightarrow \pi_{\text{Py,CO}}^*)$ | $^3(n_{\text{O}} \rightarrow \pi_{\text{CO}}^*)$ |
|-------------------------------------------------------------|------|-----------------------------------------------------|--------------------------------------------------------|--------------------------------------------------|
| C <sub>2</sub> C <sub>3</sub>                               | 1.50 | 1.42                                                | 1.50                                                   | 1.43                                             |
| C <sub>3</sub> O <sub>1</sub>                               | 1.21 | 1.27                                                | 1.22                                                   | 1.36                                             |
| C <sub>3</sub> C <sub>4</sub>                               | 1.48 | 1.47                                                | 1.46                                                   | 1.44                                             |
| C <sub>4</sub> C <sub>5</sub>                               | 1.39 | 1.47                                                | 1.47                                                   | 1.39                                             |
| C <sub>5</sub> C <sub>6</sub>                               | 1.43 | 1.38                                                | 1.35                                                   | 1.43                                             |
| C <sub>6</sub> C <sub>7</sub>                               | 1.37 | 1.41                                                | 1.49                                                   | 1.38                                             |
| N <sub>1</sub> C <sub>4</sub>                               | 1.36 | 1.37                                                | 1.41                                                   | 1.37                                             |
| N <sub>1</sub> C <sub>7</sub>                               | 1.37 | 1.32                                                | 1.43                                                   | 1.36                                             |
| C <sub>1</sub> C <sub>2</sub> C <sub>3</sub> O <sub>1</sub> | 33   | 0                                                   | 42                                                     | 11                                               |
| O <sub>1</sub> C <sub>3</sub> C <sub>4</sub> N <sub>1</sub> | 17   | 80                                                  | 8                                                      | 33                                               |
| C <sub>2</sub> C <sub>3</sub> C <sub>4</sub> C <sub>5</sub> | 22   | 91                                                  | 10                                                     | 28                                               |
| C <sub>7</sub> N <sub>1</sub> C <sub>4</sub> C <sub>8</sub> | 174  | 173                                                 | 127                                                    | 175                                              |

18 *Time resolved measurements:* Ketorolac transient absorption spectra and kinetics were  
 19 recorded with a LFP-111 laser-flash photolysis system (Luzchem Inc., Ottawa, Canada),  
 20 using the fourth harmonic from a Surelite II, Nd-YAG laser (266 nm, *ca.* 10 ns, 8



1 mJ/pulse) as excitation source. The transient spectra were recorded using a 7x7 mm cell  
2 flow system (from Luzchem Inc.), averaging 3 laser shots at each wavelength. Ketorolac  
3 triplet quenching experiments were performed by using 1,4-cyclohexadiene, 2-propanol,  
4 tryptophan methyl ester, tyrosine methyl ester and 2'-deoxyguanosine as quenchers  
5 employing for excitation the third harmonic of a Nd-YAG laser (355 nm, *ca.* 10 ns, 8  
6 mJ/pulse). The same setup was employed for energy transfer experiments from  
7 benzophenone triplet excited state. Singlet oxygen kinetic time profiles were measured by  
8 recording the singlet oxygen phosphorescence at 1270 nm, using a Hamamatsu NIR  
9 detector (peltier cooled at -62.8°C operating at 700 V, coupled to a grating  
10 monochromator) after laser excitation by a Surelite II, Nd-YAG laser (266 nm, *ca.* 10 ns,  
11 from up to 8 mJ/pulse). The data were acquired and processed with a customized  
12 Luzchem Research LFP-111 system. Primary data fitted well a monoexponential decay  
13 rendering the signal intensity at time zero for each different laser power excitation. From  
14 these data the singlet oxygen quantum yield was calculated according to Eq. 1.<sup>8</sup>

$$15 \quad \Phi_{Ketorolac} = \Phi_{Phen} \frac{\text{slope}_{Ketorolac}}{\text{slope}_{Phen}} \quad (1)$$

16 where  $\text{slope}_{Ketorolac}$  and  $\text{slope}_{Phen}$  correspond to the slopes from laser power dependence  
17 experiments.  $\Phi_{Phen}$  corresponds to phenalenone singlet oxygen quantum yield  $\sim 1.0$ .<sup>8</sup>

18 *Low temperature ketorolac triplet phosphorescence emission:* The low temperature (77K)  
19 phosphorescence spectrum was recorded in EPA solution (ethyl ether:iso-pentane:ethanol  
20 mixture 5:5:2)<sup>99</sup> on a PTI model 100 spectrofluorometer, employing a pulsed Xenon lamp  
21 ( $\lambda_{exc}=300$  nm) and a low-temperature accessory.

22 *Photodecarboxylation quantum yield:* Decarboxylation quantum yields were estimated  
23 from following the drug consumption by UV-Vis spectroscopy over time elicited from

1 sample exposure to a Xenon Lamp (Luzchem Inc., Ottawa, Canada) equipped with a  
2 water filter to prevent sample heating. Light absorbed doses were measured by using a  
3 SPR-4001 Spectroradiometer (Luzchem Inc., Ottawa, Canada); in all quantum yield  
4 calculations only initial slopes were considered in order to avoid sequential contribution  
5 of oxidation products produced during the irradiation.

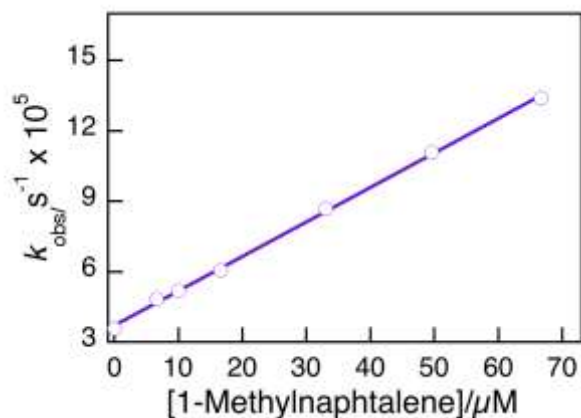

6  
7

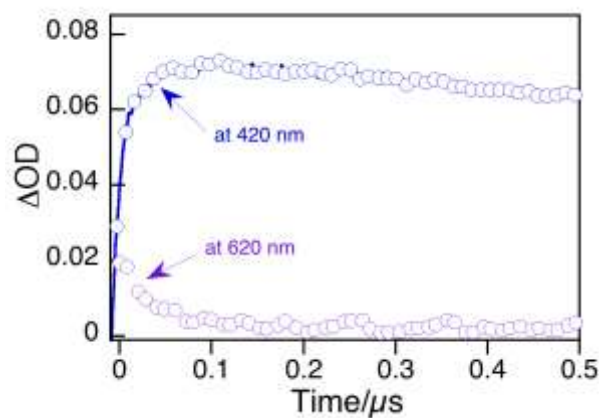

8  
9

10 **Figure S5.**  $1/k_{\text{obs}}$  at 620 nm as function of 1-methylnaphthalene concentration (**top**) and  
11 transient signal profile for ketorolac at 620 nm and 1-methylnaphthalene at 420 nm after  
12 laser excitation (**bottom**). All measurements were performed in deaerated acetonitrile at  
13 room temperature.

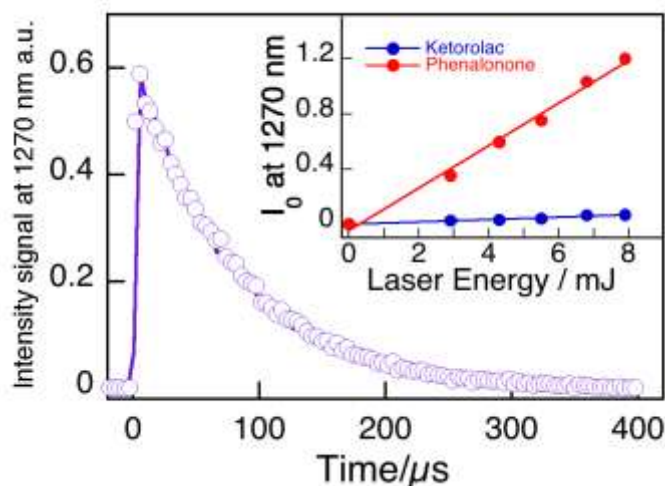

1  
2  
3  
4  
5  
6  
7

**Figure S6.** Singlet oxygen phosphorescence time profile at 1270 nm obtained after laser excitation at 266 nm. The inset shows the changes in initial signal at different laser powers for ketorolac (blue circles) or phenalenone (red circles). All measurements were performed in acetonitrile at room temperature.

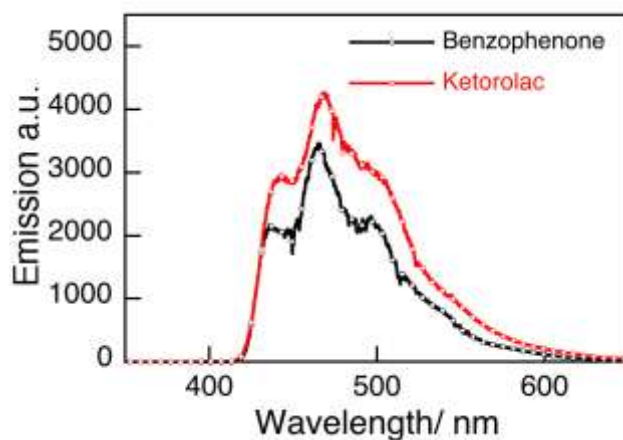

8

9 **Figure S7.** Ketorolac phosphorescence spectrum. Benzophenone phosphorescence  
10 spectrum has been added for comparison purposes.

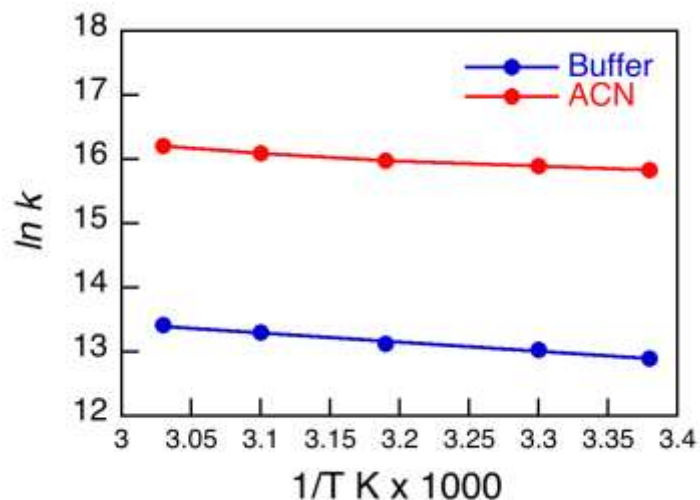

1  
2 **Figure S8.** Dependence of natural logarithm of the rate constant for Ketorolac transient at  
3 620 nm with the reciprocal of the temperature. In acetonitrile (red circles) or buffer pH  
4 7.4 (blue circles) in nitrogen saturated solution. The relative error was less than 5% for all  
5 of them.

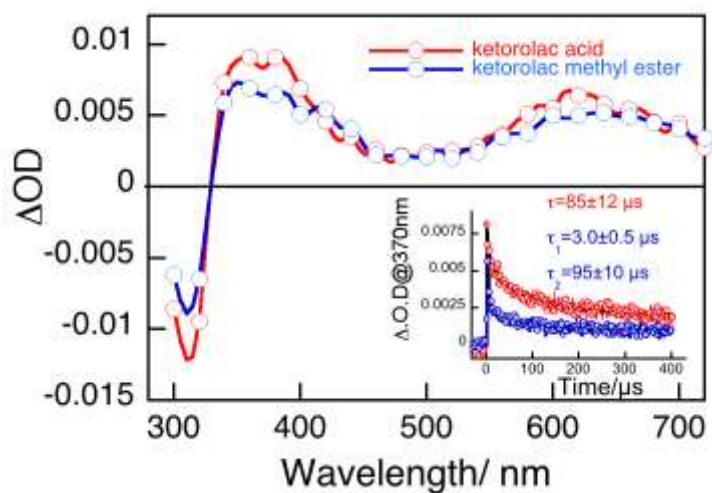

6  
7  
8 **Figure S9.** Transient absorption spectra for ketorolac acid (red circles) and ketorolac  
9 methyl ester (blue circles) obtained 1.0  $\mu$ s after 266 nm laser excitation. Inset:  $\Delta$ OD  
10 dependence at 370 nm. All measurements were performed in acetonitrile.

11  
12

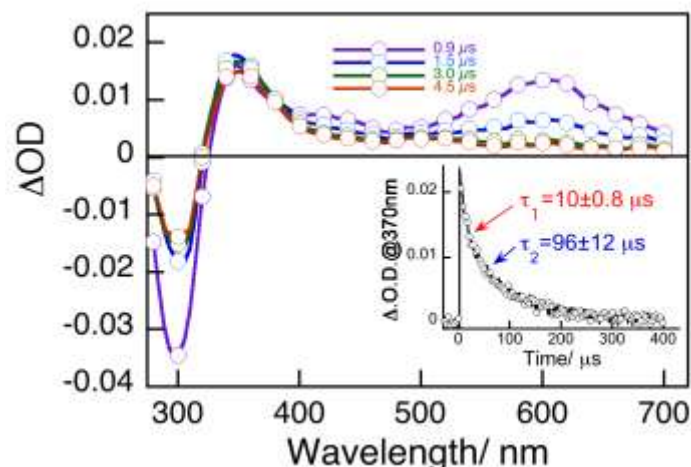

1

2 **Figure S10.** 2-Benzoylpyrrole transient absorption spectra obtained at 0.9, 1.5, 3.5 and  
3 4.5  $\mu$ s after 266 nm laser excitation under nitrogen. Inset: kinetic time profile monitored  
4 at 370 nm. All measurements were performed in acetonitrile at room temperature.

5

## 6 **References**

- 7 1. H. J. Doh, W. J. Cho, C. S. Yong, H. G. Choi, J. S. Kim, C. H. Lee and D. D.  
8 Kim, *J. Pharm. Sci.*, 2003, **92**, 1008-1017.
- 9 2. G. Cosa, L. Llauger, J. C. Scaiano and M. A. Miranda, *Org. Lett.*, 2002, **4**, 3083-  
10 3085.
- 11 3. L. Gu, H.-S. Chiang and D. Johnson, *Int. J. Pharm.*, 1988, **41**, 105-113.
- 12 4. M. J. Frisch, G. W. Trucks, H. B. Schlegel, G. E. Scuseria, M. A. Robb, J. R.  
13 Cheeseman, G. Scalmani, V. Barone, B. Mennucci, G. A. Petersson, H. Nakatsuji,  
14 M. Caricato, X. Li, H. P. Hratchian, A. F. Izmaylov, J. Bloino, G. Zheng, J. L.  
15 Sonnenberg, M. Hada, M. Ehara, K. Toyota, R. Fukuda, J. Hasegawa, M. Ishida,  
16 T. Nakajima, Y. Honda, O. Kitao, H. Nakai, T. Vreven, J. Montgomery, J. A., J.  
17 E. Peralta, F. Ogliaro, M. Bearpark, J. J. Heyd, E. Brothers, K. N. Kudin, V. N.  
18 Staroverov, R. Kobayashi, J. Normand, K. Raghavachari, A. Rendell, J. C.  
19 Burant, S. S. Iyengar, J. Tomasi, M. Cossi, N. Rega, N. J. Millam, M. Klene, J. E.  
20 Knox, J. B. Cross, V. Bakken, C. Adamo, J. Jaramillo, R. Gomperts, R. E.  
21 Stratmann, O. Yazyev, A. J. Austin, R. Cammi, C. Pomelli, J. W. Ochterski, R. L.  
22 Martin, K. Morokuma, V. G. Zakrzewski, G. A. Voth, P. Salvador, J. J.  
23 Dannenberg, S. Dapprich, A. D. Daniels, Ö. Farkas, J. B. Foresman, J. V. Ortiz, J.  
24 Cioslowski and D. J. Fox, 2009.
- 25 5. F. Aquilante, L. De Vico, N. Ferré, G. Ghigo, P.-Å. Malmqvist, P. Neogrády, T.  
26 B. Pedersen, M. Pitoňák, M. Reiher, B. O. Roos, L. Serrano-Andrés, M. Urban, V.  
27 Veryazov and R. J. Lindh, *J. Comput. Chem.*, 2010, **31**, 224-227.
- 28 6. B. O. Roos, R. Lindh, P.-Å. Malmqvist, V. Veryazov and P.-O. Widmark, *J. Phys.*  
29 *Chem. A.*, 2004, **108**, 2851-2858.
- 30 7. N. J. Turro, V. Ramamurthy and J. C. Scaiano, *Principles of molecular*  
31 *photochemistry*, University Science Books, Sausalito, California, 2009.

- 1 8. S. Nonell and S. E. Braslavsky, *Meth. Enzymol.*, 2000, **319**, 37-49.
- 2 9. S. L. Murov, I. Carmichael and G. L. Hug, *Handbook of photochemistry*, Merce
- 3 Decker Inc, New York, 1993.

4

5
